# Supplementary material for: Therapeutic Modulation of Meningeal Lymphatics: A Systematic Review of Preclinical Evidence Across Neurological Disorders
Source: Research Square preprint supplement (doi:10.21203/rs.3.rs-6899363/v1), 2025-07-01
Supplement: Supplementary file 1 [file fe3c303e9bef99d754a93296.docx]

| **No.** | **Studies** | **Year** | **Selection bias - Sequence generation** | **Selection bias - Baseline characteristics** | **Selection bias - Allocation concealment** | **Performance bias - Random housing** | **Performance bias - Blinding** | **Detection bias - Random outcome assesment** | **Detection bias - Blinding** | **Attrition bias - Incomplete outcome data** | **Reporting bias - Selective outcome reporting** | **Other - Other sources of bias** |
| --- | --- | --- | --- | --- | --- | --- | --- | --- | --- | --- | --- | --- |
| 1 | Antila et al. | 2024 | 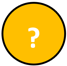 | 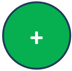 | 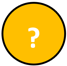 | 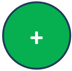 | 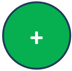 | 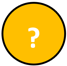 | 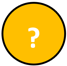 | 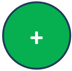 | 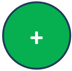 | 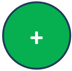 |
| 2 | Bai et al. | 2022 | 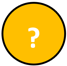 | 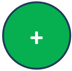 | 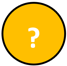 | 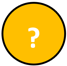 | 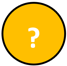 | 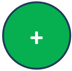 | 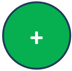 | 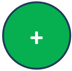 | 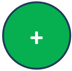 | 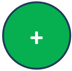 |
| 3 | Boisserand et al. | 2024 | 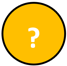 | 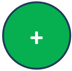 | 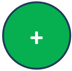 | 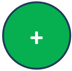 | 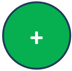 | 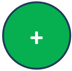 | 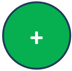 | 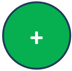 | 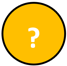 | 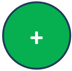 |
| 4 | Chen et al. | 2024 | 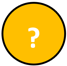 | 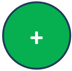 | 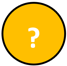 | 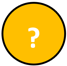 | 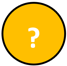 | 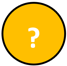 | 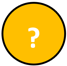 | 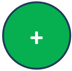 | 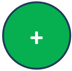 | 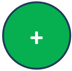 |
| 5 | Choi et al. | 2021 | 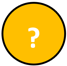 | 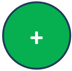 | 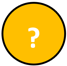 | 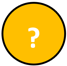 | 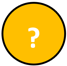 | 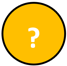 | 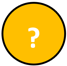 | 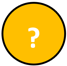 | 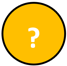 | 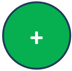 |
| 6 | Choi et al. | 2024 | 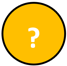 | 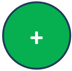 | 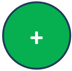 | 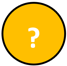 | 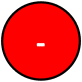 | 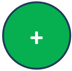 | 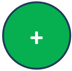 | 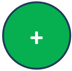 | 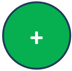 | 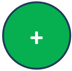 |
| 7 | DaMesquita et al. | 2018 | 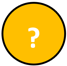 | 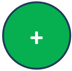 | 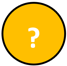 | 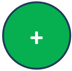 | 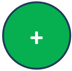 | 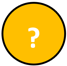 | 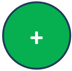 | 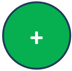 | 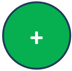 | 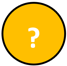 |
| 8 | DaMesquita et al. | 2021 | 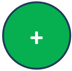 | 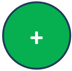 | 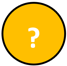 | 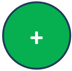 | 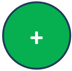 | 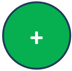 | 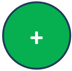 | 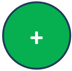 | 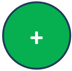 | 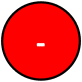 |
| 9 | Ding et al. | 2019 | 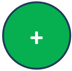 | 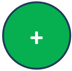 | 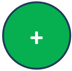 | 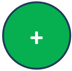 | 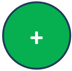 | 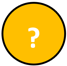 | 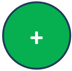 | 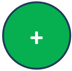 | 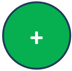 | 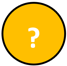 |
| 10 | Dong et al. | 2024 | 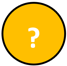 | 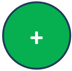 | 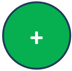 | 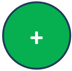 | 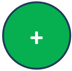 | 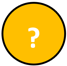 | 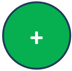 | 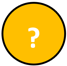 | 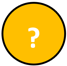 | 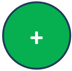 |
| 11 | Hussain et al. | 2023 |  |  |  |  |  |  |  |  |  |  |
| 12 | Keuters et al. | 2025 |  |  |  |  |  |  |  |  |  |  |
| 13 | Li et al. | 2023 |  |  |  |  |  |  |  |  |  |  |
| 14 | Li et al. | 2024 |  |  |  |  |  |  |  |  |  |  |
| 15 | Liao et al. | 2023 |  |  |  |  |  |  |  |  |  |  |
| 16 | Lin et al. | 2021 |  |  |  |  |  |  |  |  |  |  |
| 17 | Lin et al. | 2023 |  |  |  |  |  |  |  |  |  |  |
| 18 | Liu et al. | 2023 |  |  |  |  |  |  |  |  |  |  |
| 19 | Liu et al. | 2023 |  |  |  |  |  |  |  |  |  |  |
| 20 | Lu et al. | 2025 |  |  |  |  |  |  |  |  |  |  |
| 21 | Luo et al. | 2024 |  |  |  |  |  |  |  |  |  |  |
| 22 | Oxana et al. | 2023 |  |  |  |  |  |  |  |  |  |  |
| 23 | Shan et al | 2024 |  |  |  |  |  |  |  |  |  |  |
| 24 | Tsai et al. | 2022 |  |  |  |  |  |  |  |  |  |  |
| 25 | Wang et al. | 2023 |  |  |  |  |  |  |  |  |  |  |
| 26 | Wang et al. | 2024 |  |  |  |  |  |  |  |  |  |  |
| 27 | Wu et al. | 2023 |  |  |  |  |  |  |  |  |  |  |
| 27 | Ye et al. | 2024 |  |  |  |  |  |  |  |  |  |  |
| 28 | Ye et al. | 2024 |  |  |  |  |  |  |  |  |  |  |
| 29 | Yuan et al. | 2024 |  |  |  |  |  |  |  |  |  |  |
